# Supplementary material
Source: PubMed Central journal article supplement (PMC3320177)
Supplement: supp_pp.111.192765_192765Supplemental_figures.pdf [file supp_pp.111.192765_192765Supplemental_figures.pdf]

## Supplemental Figure Legends

**Supplemental Figure S1.** Expression of control genes in roots treated with 5  $\mu\text{M}$  BA for the indicated times as determined by Nanostring analysis.

**Supplemental Figure S2.** Effect of auxin treatment on expression of cytokinin-function genes in the shoot. Comparison plots of expression in shoots of genes encoding: (A) cytokinin receptors and HPts; (B) response regulators; (C) cytokinin biosynthetic enzymes; and (D) cytokinin oxidases. 12-day-old hydroponically grown rice seedlings were treated with auxin for two hours by addition of 10  $\mu\text{M}$  IAA to the hydroponic media. Total RNA was isolated from the roots and the transcript levels for the indicated genes quantified using NanoString nCounter analysis. The normalized counts for each transcript from roots derived from seedlings treated with 10  $\mu\text{M}$  IAA or a vehicle control as indicated on each axis are shown. Dotted lines represent variation greater than two-fold in expression levels between control and BA-treated samples.

**Supplemental Figure S3.** Effect of  $\text{GA}_3$  treatment on expression of cytokinin-function genes in the root. Comparison plots of expression in roots of genes encoding: (A) cytokinin receptors and HPts; (B) response regulators; (C) cytokinin biosynthetic enzymes; and (D) cytokinin oxidases. 12-day-old hydroponically grown rice seedlings were treated with 10  $\mu\text{M}$   $\text{GA}_3$  to the hydroponic media for two hours. Total RNA was isolated from the roots and the transcript levels for the indicated genes quantified using NanoString nCounter analysis. The normalized counts for each transcript from roots derived from seedlings treated with 10  $\mu\text{M}$   $\text{GA}_3$  or a vehicle control as indicated on each axis are shown. Dotted lines represent variation greater than two-fold in expression levels between control and BA-treated samples.

**Supplemental Figure S4.** Effect of brassinosteroid treatment on expression of cytokinin-function genes in the root. Comparison plots of expression in roots of genes encoding: (A) cytokinin receptors and HPts; (B) response regulators; (C) cytokinin biosynthetic enzymes; and (D) cytokinin oxidases. 12-day-old hydroponically grown rice seedlings were treated with 1  $\mu\text{M}$  brassinosteroid to the hydroponic media for two hours. Total RNA was isolated from the roots and the transcript levels for the indicated genes quantified using NanoString nCounter analysis. The

normalized counts for each transcript from roots derived from seedlings treated with 1  $\mu$ M brassinosteroid or a vehicle control as indicated on each axis are shown. Dotted lines represent variation greater than two-fold in expression levels between control and BA-treated samples.

**Supplemental Figure S5.** Effect of ABA treatment on expression of cytokinin-function genes in the root. Comparison plots of expression in roots of genes encoding: (A) cytokinin receptors and HPTs; (B) response regulators; (C) cytokinin biosynthetic enzymes; and (D) cytokinin oxidases. 12-day-old hydroponically grown rice seedlings were treated with 50  $\mu$ M ABA to the hydroponic media for two hours. Total RNA was isolated from the roots and the transcript levels for the indicated genes quantified using NanoString nCounter analysis. The normalized counts for each transcript from roots derived from seedlings treated with 50  $\mu$ M ABA or a vehicle control as indicated on each axis are shown. Dotted lines represent variation greater than two-fold in expression levels between control and BA-treated samples.

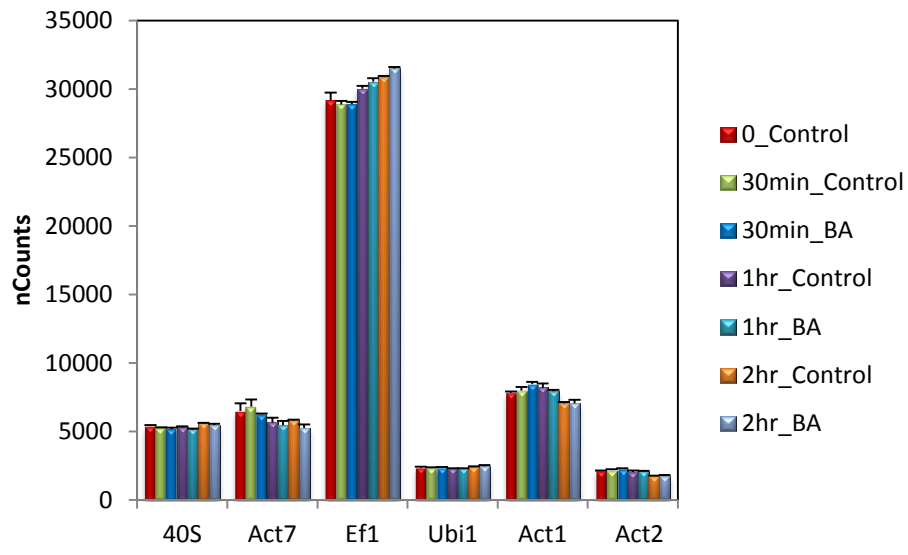

Supplementary Figure S1

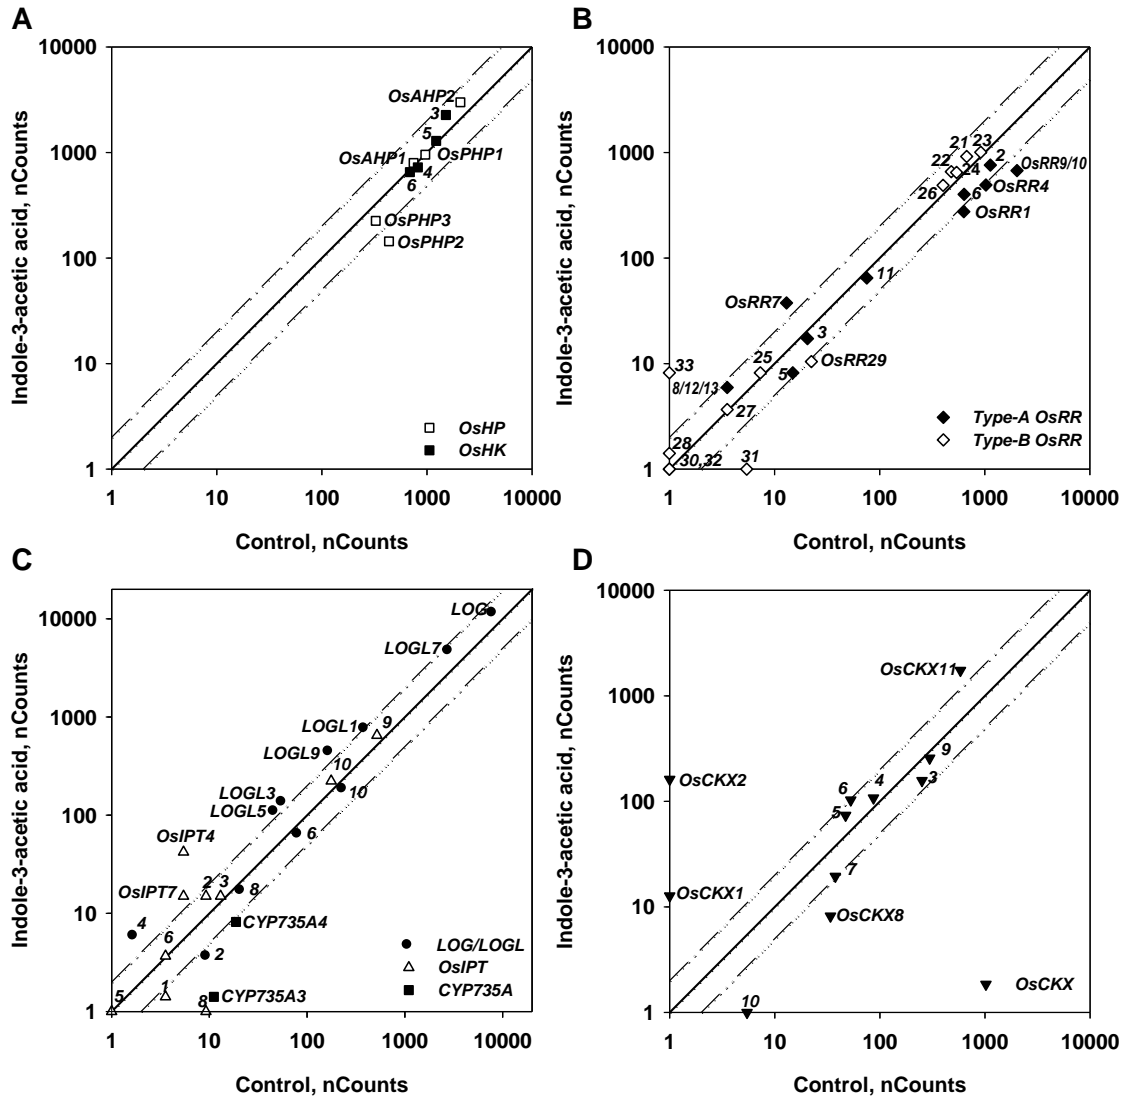

**Supplemental Figure S2.** Effect of auxin treatment on expression of cytokinin-function genes in the shoot. Comparison plots of expression in shoots of genes encoding: (A) cytokinin receptors and HPTs; (B) response regulators; (C) cytokinin biosynthetic enzymes; and (D) cytokinin oxidases. 12-day-old hydroponically grown rice seedlings were treated with auxin for two hours by addition of 10  $\mu\text{M}$  IAA to the hydroponic media. Total RNA was isolated from the roots and the transcript levels for the indicated genes quantified using NanoString nCounter analysis. The normalized counts for each transcript from roots derived from seedlings treated with 10  $\mu\text{M}$  IAA or a vehicle control as indicated on each axis are shown. Dotted lines represent variation greater than two-fold in expression levels between control and BA-treated samples.

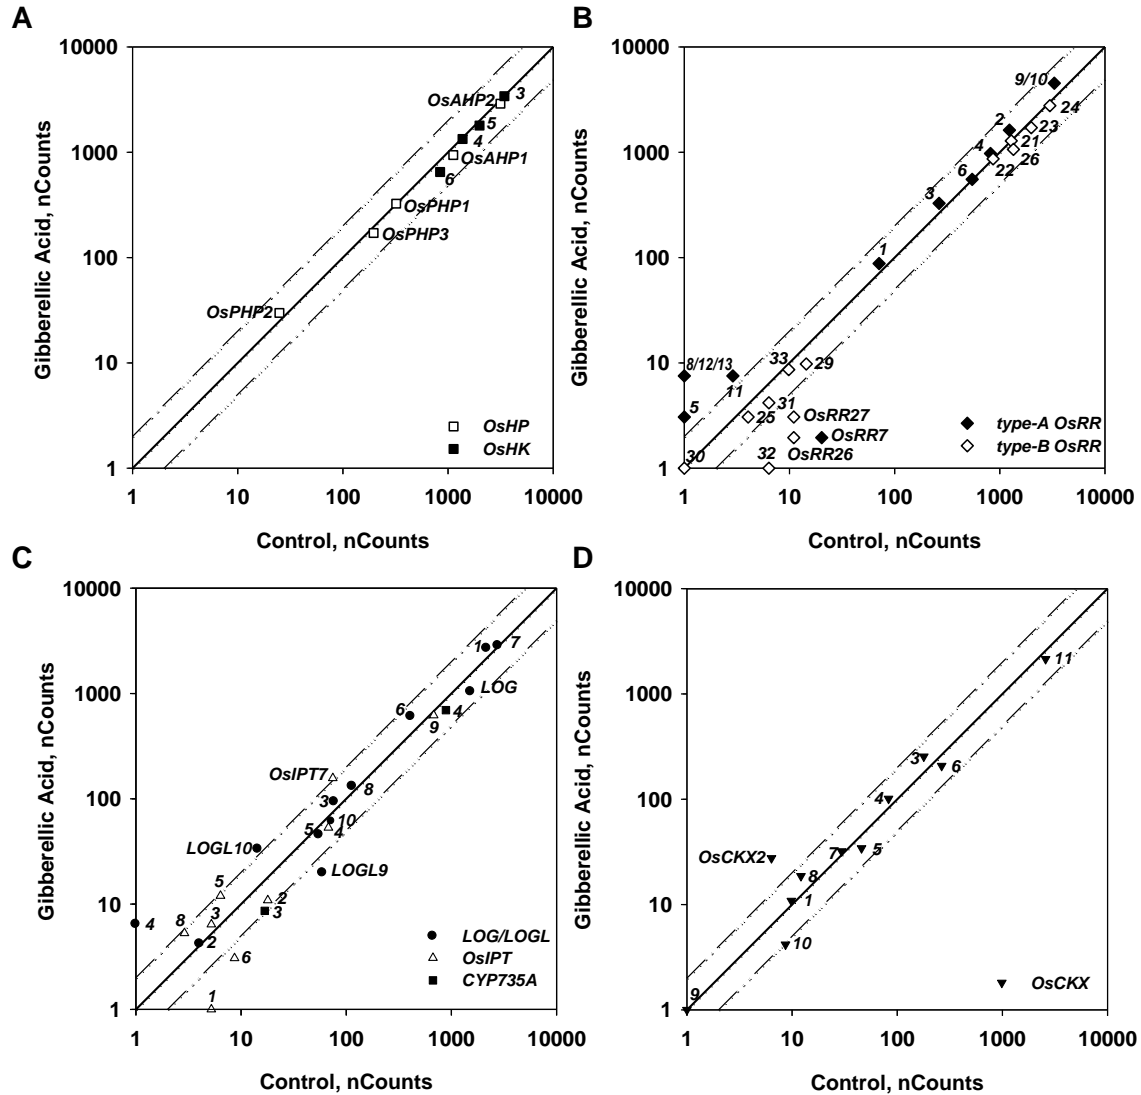

**Supplemental Figure S3.** Effect of GA3 treatment on expression of cytokinin-function genes in the root. Comparison plots of expression in roots of genes encoding: (A) cytokinin receptors and HPTs; (B) response regulators; (C) cytokinin biosynthetic enzymes; and (D) cytokinin oxidases. 12-day-old hydroponically grown rice seedlings were treated with 10  $\mu$ M GA3 to the hydroponic media for two hours. Total RNA was isolated from the roots and the transcript levels for the indicated genes quantified using NanoString nCounter analysis. The normalized counts for each transcript from roots derived from seedlings treated with 10  $\mu$ M GA3 or a vehicle control as indicated on each axis are shown. Dotted lines represent variation greater than two-fold in expression levels between control and BA-treated samples.

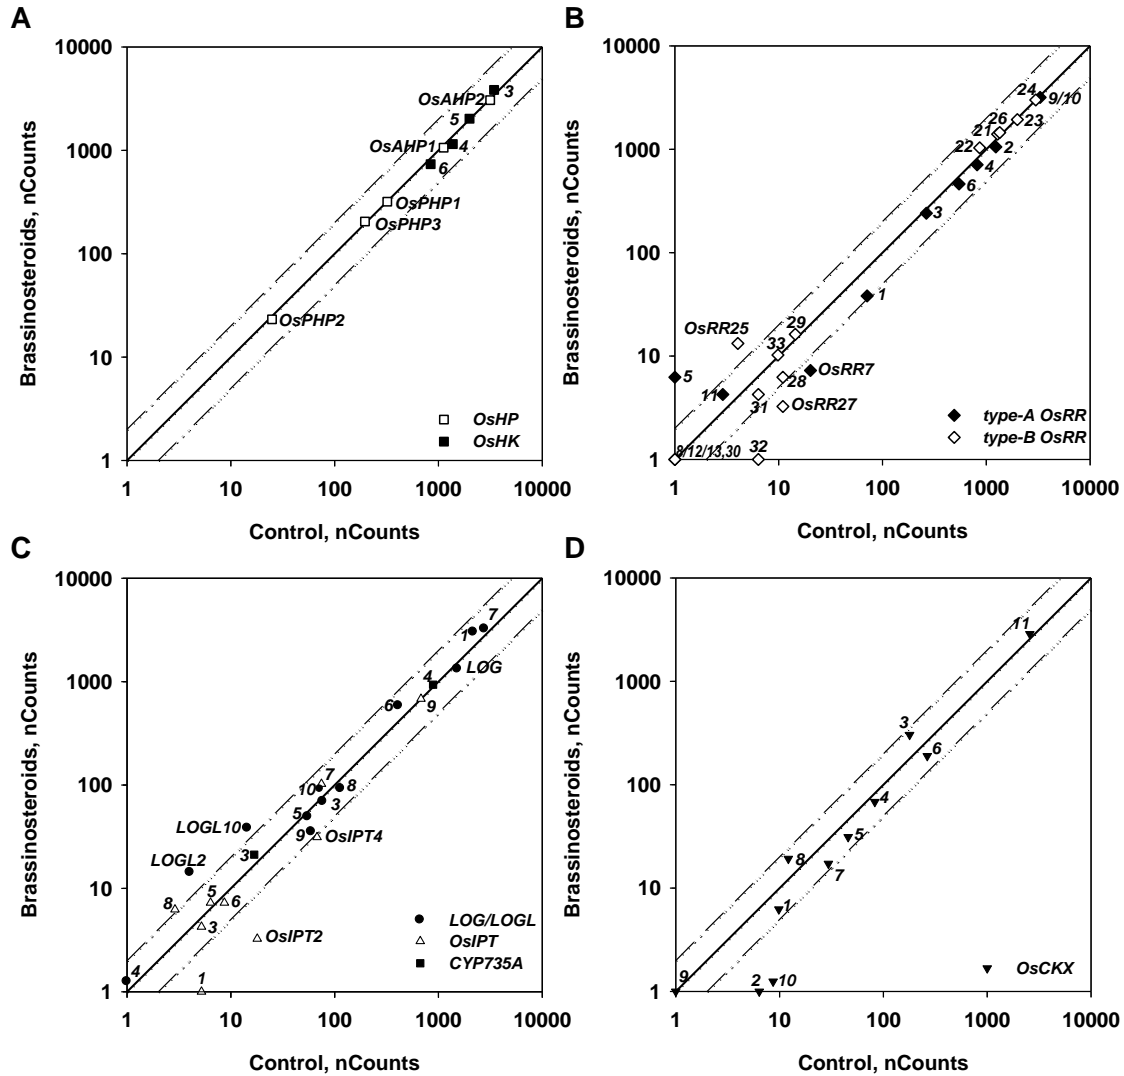

**Supplemental Figure S4.** Effect of brassinosteroid treatment on expression of cytokinin-function genes in the root. Comparison plots of expression in roots of genes encoding: (A) cytokinin receptors and HPTs; (B) response regulators; (C) cytokinin biosynthetic enzymes; and (D) cytokinin oxidases. 12-day-old hydroponically grown rice seedlings were treated with 1  $\mu$ M brassinosteroid to the hydroponic media for two hours. Total RNA was isolated from the roots and the transcript levels for the indicated genes quantified using NanoString nCounter analysis. The normalized counts for each transcript from roots derived from seedlings treated with 1  $\mu$ M brassinosteroid or a vehicle control as indicated on each axis are shown. Dotted lines represent variation greater than two-fold in expression levels between control and BA-treated samples.

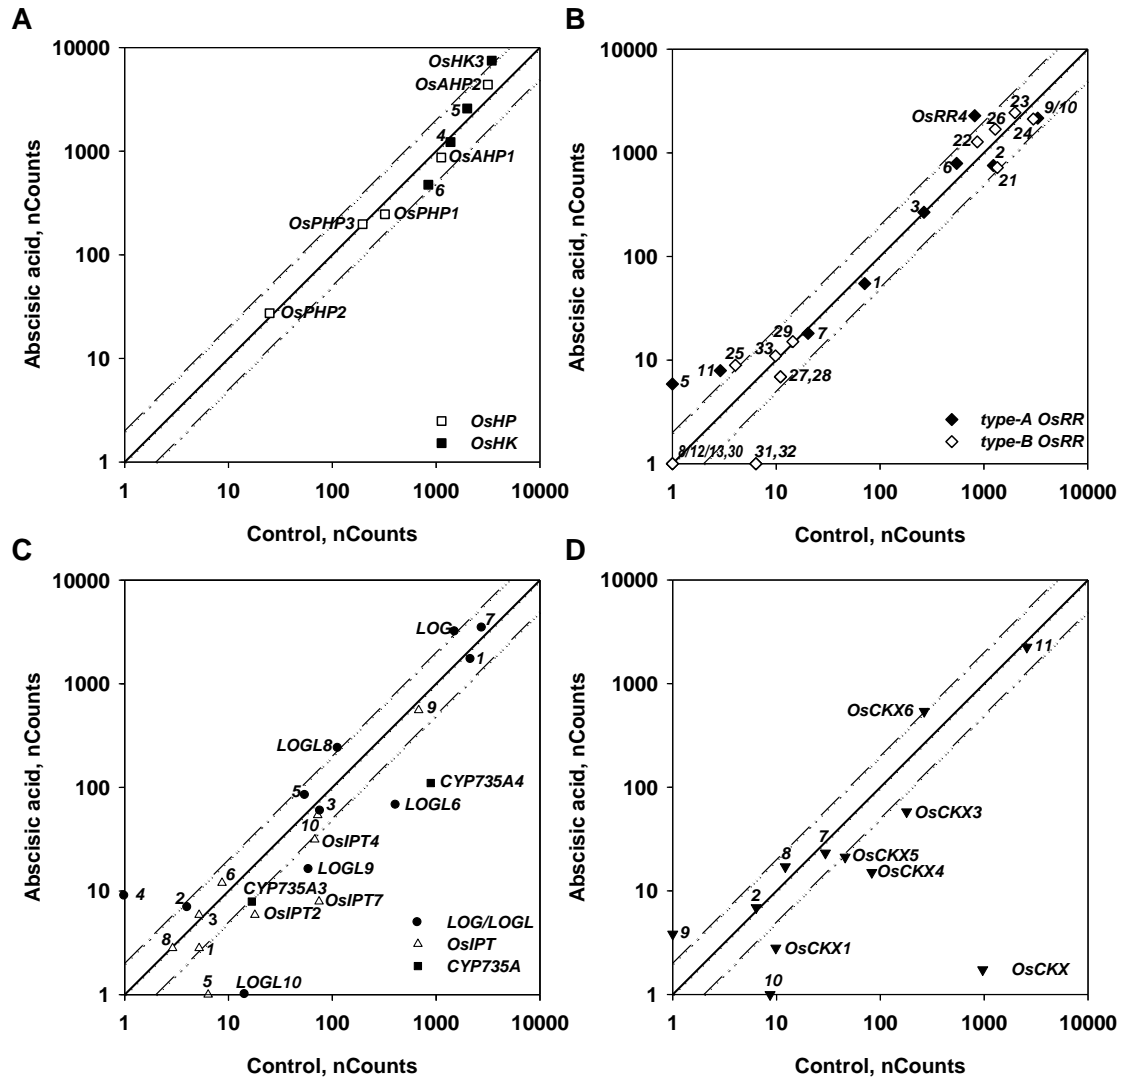

**Supplemental Figure S5.** Effect of ABA treatment on expression of cytokinin-function genes in the root. Comparison plots of expression in roots of genes encoding: (A) cytokinin receptors and HPTs; (B) response regulators; (C) cytokinin biosynthetic enzymes; and (D) cytokinin oxidases. 12-day-old hydroponically grown rice seedlings were treated with 50  $\mu$ M ABA to the hydroponic media for two hours. Total RNA was isolated from the roots and the transcript levels for the indicated genes quantified using NanoString nCounter analysis. The normalized counts for each transcript from roots derived from seedlings treated with 50  $\mu$ M ABA or a vehicle control as indicated on each axis are shown. Dotted lines represent variation greater than two-fold in expression levels between control and BA-treated samples.
