# Supplementary material
Source: PubMed Central journal article supplement (PMC3320177)
Supplement: supp_pp.111.192765_192765Supplemental_Tables_1_and_5.pdf [file supp_pp.111.192765_192765Supplemental_Tables_1_and_5.pdf]

**Supplementary Table S1. Nomenclature for Two-component elements of rice<sup>a</sup>**

| Gene Symbol                                               | Synonyms                                                    | TIGR locus ID  | RAP Locus                  | Features       |
|-----------------------------------------------------------|-------------------------------------------------------------|----------------|----------------------------|----------------|
| <u>Rice cytokinin receptors</u>                           |                                                             |                |                            |                |
| OsHK3 <sup>b</sup>                                        | Crl2 <sup>c</sup> , Ohk2 <sup>d</sup>                       | LOC_Os01g69920 | Os01g0923700               | CHASE, HK, Rec |
| OsHK4 <sup>b</sup>                                        | Crl1b <sup>c</sup> , Ohk4 <sup>d</sup>                      | LOC_Os03g50860 | Os03g0717700               | CHASE, HK, Rec |
| OsHK5 <sup>b</sup>                                        | Crl3 <sup>c</sup> , Ohk3 <sup>d</sup> , OsHK2 <sup>e</sup>  | LOC_Os10g21810 | Os10g0362300               | CHASE, HK, Rec |
| OsHK6 <sup>b</sup>                                        | Crl1a <sup>c</sup> , Ohk5 <sup>d</sup> , OsHK1 <sup>e</sup> | LOC_Os02g50480 | Os02g0738400, Os02g0738500 | CHASE, HK, Rec |
| OsCRL4 <sup>e</sup>                                       | OsHKL1 <sup>e</sup>                                         | LOC_Os12g26940 | Os12g0454800               | CHASE          |
| <u>Rice Histidine phosphotransfer protein gene family</u> |                                                             |                |                            |                |
| OsAHP1 <sup>a</sup>                                       | Hpt2 <sup>b</sup> , Ohp1 <sup>d</sup> , OsHP2 <sup>e</sup>  | LOC_Os08g44350 | Os08g0557700               | HPT            |
| OsAHP2 <sup>a</sup>                                       | Hpt3 <sup>b</sup> , Ohp2 <sup>d</sup> , OsHP1 <sup>e</sup>  | LOC_Os09g39400 | Os09g0567400               | HPT            |
| OsPHP1 <sup>a</sup>                                       | Hpt1 <sup>b</sup> , OsHP3 <sup>e</sup>                      | LOC_Os01g54050 | Os01g0743800               | Pseudo-HPT     |
| OsPHP2 <sup>a</sup>                                       | Hpt4 <sup>b</sup> , OsHP5 <sup>e</sup>                      | LOC_Os05g09410 | Os05g0186100               | Pseudo-HPT     |
| OsPHP3 <sup>a</sup>                                       | Hpt5 <sup>b</sup> , OsHP4 <sup>e</sup>                      | LOC_Os05g44570 | Os05g0521300               | Pseudo-HPT     |
| <u>Rice type-A response regulators</u>                    |                                                             |                |                            |                |
| OsRR1 <sup>f</sup>                                        | Rra9 <sup>b</sup>                                           | LOC_Os04g36070 | Os04g0442300               | Rec            |
| OsRR2 <sup>f</sup>                                        | Rra10 <sup>b</sup>                                          | LOC_Os02g35180 | Os02g0557800               | Rec            |
| OsRR3 <sup>f</sup>                                        | Rra7 <sup>b</sup>                                           | LOC_Os02g58350 | Os02g0830200               | Rec            |
| OsRR4 <sup>f</sup>                                        | Rra3 <sup>b</sup>                                           | LOC_Os01g72330 | Os01g0952500               | Rec            |
| OsRR5 <sup>f</sup>                                        | Rra4 <sup>b</sup>                                           | LOC_Os04g44280 | Os04g0524300               | Rec            |
| OsRR6 <sup>f</sup>                                        | Rra6 <sup>b</sup>                                           | LOC_Os04g57720 | Os04g0673300               | Rec            |
| OsRR7 <sup>f</sup>                                        | Rra5 <sup>b</sup>                                           | LOC_Os07g26720 | Os07g0449700               | Rec            |
| OsRR8 <sup>f</sup>                                        | Rra13 <sup>b</sup> , OsRR15 <sup>e</sup>                    | LOC_Os08g28900 | Os08g0376700               | Rec            |
| OsRR9 <sup>f</sup>                                        | Rra1 <sup>b</sup>                                           | LOC_Os11g04720 | Os11g0143300               | Rec            |
| OsRR10 <sup>f</sup>                                       | Rra2 <sup>b</sup>                                           | LOC_Os12g04500 | Os12g0139400               | Rec            |
| OsRR11 <sup>d</sup>                                       | Rra8 <sup>b</sup>                                           | LOC_Os02g42060 | Os02g0631700               | Rec            |
| OsRR12 <sup>d</sup>                                       | Rra11 <sup>b</sup> , OsRR8 <sup>e</sup>                     | LOC_Os08g28950 | Os08g0377200               | Rec            |
| OsRR13 <sup>d</sup>                                       | Rra12 <sup>b</sup> , OsRR12 <sup>e</sup>                    | LOC_Os08g26990 | Os08g0358800               | Rec            |
| <u>Rice type-B response regulators</u>                    |                                                             |                |                            |                |
| OsRR21 <sup>a</sup>                                       | Rrb1 <sup>b</sup> , Orr1 <sup>d</sup> , OsRR19 <sup>e</sup> | LOC_Os03g12350 | Os03g0224200               | Rec, Myb       |
| OsRR22 <sup>a</sup>                                       | Rrb4 <sup>b</sup> , Orr2 <sup>d</sup> , OsRR20 <sup>e</sup> | LOC_Os06g08440 | Os06g0183100               | Rec, Myb       |
| OsRR23 <sup>a</sup>                                       | Rrb5 <sup>b</sup> , Orr3 <sup>d</sup> , OsRR18 <sup>e</sup> | LOC_Os02g55320 | Os02g0796500               | Rec, Myb       |
| OsRR24 <sup>a</sup>                                       | Rrb2 <sup>b</sup> , Orr4 <sup>d</sup> , OsRR17 <sup>e</sup> | LOC_Os02g08500 | Os02g0182100               | Rec, Myb       |
| OsRR25 <sup>a</sup>                                       | Rrb3 <sup>b</sup> , Orr5 <sup>d</sup> , OsRR21 <sup>e</sup> | LOC_Os06g43910 | Os06g0647200               | Rec, Myb       |
| OsRR26 <sup>a</sup>                                       | Rrb6 <sup>b</sup> , Orr6 <sup>d</sup> , OsRR16 <sup>e</sup> | LOC_Os01g67770 | Os01g0904700               | Rec, Myb       |
| OsRR27 <sup>a</sup>                                       | Rra16 <sup>b</sup> , OsPRR5 <sup>e</sup>                    | LOC_Os05g32880 | Os05g0395600               | Rec, Myb       |
| OsRR28 <sup>a</sup>                                       | Rra22 <sup>b</sup> , OsPRR3 <sup>e</sup>                    | LOC_Os04g28160 | Os04g0349100               | Rec, Myb       |
| OsRR29 <sup>a</sup>                                       | Rrb7 <sup>b</sup> , OsPRR4 <sup>e</sup>                     | LOC_Os04g28130 | Os04g0348800               | Rec, Myb       |
| OsRR30 <sup>a</sup>                                       | Ehd1 <sup>g</sup> , OsRR22 <sup>e</sup>                     | LOC_Os10g32600 | Os10g0463400               | Rec, Myb       |
| OsRR31 <sup>a</sup>                                       |                                                             | LOC_Os08g35650 | Os08g0458400               | Rec, Myb       |
| OsRR32 <sup>a</sup>                                       |                                                             | LOC_Os08g17760 | Os08g0279900               | Rec, Myb       |
| OsRR33 <sup>a</sup>                                       | Rra19 <sup>b</sup>                                          | LOC_Os08g35670 | Os08g0458600               | Rec, Myb       |
| <u>Rice type-C response regulators</u>                    |                                                             |                |                            |                |
| OsRR41 <sup>a</sup>                                       | Rra14 <sup>b</sup> , OsRR14 <sup>e</sup>                    | LOC_Os03g53100 | Os03g0742300               | Rec            |
| OsRR42 <sup>a</sup>                                       | Rra15 <sup>b</sup> , OsRR13 <sup>e</sup>                    | LOC_Os04g13480 | Os04g0212450               | Rec            |
| <u>Rice pseudo-response regulators</u>                    |                                                             |                |                            |                |
| OsPRR1 <sup>h</sup>                                       |                                                             | LOC_Os02g40510 | Os02g0618200               | Rec(D-E), CCT  |
| OsPRR37 <sup>h</sup>                                      | Prr4 <sup>b</sup>                                           | LOC_Os07g49460 | Os07g0695100               | Rec(D-E), CCT  |
| OsPRR73 <sup>h</sup>                                      | Prr3 <sup>b</sup>                                           | LOC_Os03g17570 | Os03g0284100               | Rec(D-E), CCT  |
| OsPRR59 <sup>h</sup>                                      | Prr5 <sup>b</sup>                                           | LOC_Os11g05930 | Os11g0157600               | Rec(D-E), CCT  |
| OsPRR95 <sup>h</sup>                                      | Prr2 <sup>b</sup>                                           | LOC_Os09g36220 | Os09g0532400               | Rec(D-E), CCT  |
| OsPRR10 <sup>a</sup>                                      | Rra18 <sup>b</sup>                                          | LOC_Os05g32890 | Os05g0395700               | Rec(D-E), Myb  |
| OsPRR11 <sup>a</sup>                                      |                                                             | LOC_Os04g28150 | Os04g0349000               | Rec(D-E)       |
| OsPRR12 <sup>a</sup>                                      | Rra17 <sup>b</sup>                                          | LOC_Os04g28120 | Os04g0348600               | Rec(D-A)       |

<sup>a</sup>Adapt from Schaller et al. (2007). <sup>b</sup>Pareek et al. (2006). <sup>c</sup>Han et al. (2004). <sup>d</sup>Ito and Kurata (2006). <sup>e</sup>Du et al. (2007). <sup>f</sup>Jain et al. (2006). <sup>g</sup>Doi et al. (2004). <sup>h</sup>Murakami et al. (2003). CHASE domain for cytokinin binding (CHASE). His-kinase domain (HK). Receiver domain (Rec). His-containing phosphotransfer domain (HPT). Myb-like DNA-binding domain (Myb), CCT motif found in clock proteins (CCT).

**Supplementary Table S5. Primers used in this study**

| <b>Primer Name</b>               | <b>Primer Sequence (5'→3')</b>      |
|----------------------------------|-------------------------------------|
| OsAHP1 pBS-YFP cloning F'        | ATACACATTTAATCATTCCCTATAACCAAGGGCTC |
| OsAHP1 pBS-YFP cloning R'        | AGTTGAATGTTTAGGGTAACAAGCT           |
| OsAHP2 pBS-YFP cloning F'        | GGAAAGCGAGAGGGAATAATGTAAG           |
| OsAHP2 pBS-YFP cloning R'        | TTGCTGCTTGGGATCATAAGC               |
| OsPHP1 pBS-YFP cloning F'        | GTTCTATCTTTCCCTCCTTGCTCTGG          |
| OsPHP1 pBS-YFP cloning R'        | CGGTTCTGACATGACAGGC                 |
| OsRR4 pBS-YFP cloning F'         | ATTGCCATCCACCAAAGCCA                |
| OsRR4 pBS-YFP cloning R'         | GTTTGATAAGGTCTCCACTGCAAG            |
| OsRR5 pBS-YFP cloning F'         | ACGGTCACACACAGAATTCCTAAAGC          |
| OsRR5 pBS-YFP cloning R'         | CACGGCTAACCGGAGGACG                 |
| OsRR10 pBS-YFP cloning F'        | GTAAAGCAAAGCCTTTCATGCCA             |
| OsRR10 pBS-YFP cloning R'        | ACTATGCCTTGGTCTTATTGTGTG            |
| OsRR22 pBS-YFP cloning F'        | CATCAGTCCACTCATCCCCATGC             |
| OsRR22 pBS-YFP cloning R'        | TGATATGCAGGCACCAAGTGAA              |
| OsRR23 pBS-YFP cloning F'        | TAGTACATACTACAGACTACAGAGGGATG       |
| OsRR23 pBS-YFP cloning R'        | TATGCAAGCTCCAAGGGAGTAG              |
| OsRR29 pBS-YFP cloning F'        | ACAAAGAACATAACTAGCGGAATGC           |
| OsRR29 pBS-YFP cloning R'        | ATCGCTATCGGATTCTGAATAATCC           |
| OsRR33 pBS-YFP cloning F'        | AATCACTCAAAAACACTCATCAATGAAATCTG    |
| OsRR33 pBS-YFP cloning R'        | TGAGATGACTACTGAATACTCGCT            |
| OsRR22 pEarleyGate203 cloning F' | ATGCTTCTGGGTGCTTTGAGGATG            |
| OsRR22 pEarleyGate203 cloning R' | TCATATGCAGGCACCAAGTGGA              |
| OsRR29 pEarleyGate203 cloning F' | ATGGCCCAAAAAGGAAGGACTC              |
| OsRR29 pEarleyGate203 cloning R' | GCCTCTGTCTAATCGCTATCGGA             |
| OsRR33 pEarleyGate203 cloning F' | ATGGATCAAGCGAGGATCTCGTTC            |
| OsRR33 pEarleyGate203 cloning R' | TGCGATGAGATGACTACTGACTACTC          |
| OsActin RT F'                    | TCAGCAACTGGGATGATATGGAG             |
| OsActin RT R'                    | GCCGTTGTGGTGAATGAGTAAC              |
| OsRR22 RT F'                     | TGCCAATAACCATGTAACATCAACCAAC        |
| OsRR22 RT R'                     | GGTTTTAGAAAGATAGTCACAGGCACC         |
| OsRR29 RT F'                     | TGCTGCTCATCTGCAGAAAACATCG           |
| OsRR29 RT R'                     | TAGGTTGAGTGTGGAAACGAGGCT            |
| OsRR33 RT F'                     | TACCTTCTGTGCGAAGATGGAGGAGGA         |
| OsRR33 RT R'                     | CAGCGACATTGGCCTGAATCCTTT            |
| OsHP2 qRT-PCR F                  | GTTTGGTGGACGAGCAGTTC                |
| OsHP2 qRT-PCR R                  | CTGCTGCCTTTGAGCTGATG                |
| OsRR1 qRT-PCR F                  | AGGATCAGCAGATGCATGAATG              |
| OsRR1 qRT-PCR R                  | GAGACGCTGTACGTCCTTGCTT              |
| OsRR7 qRT-PCR F                  | TGCTCAAGAAGATCAAGGAATCG             |
| OsRR7 qRT-PCR R                  | GGCACGTTCTCTGACGACATTAT             |
| OsRR9/10 qRT-PCR F               | TCATGAGGACAGCCCAATTTCTA             |
| OsRR9/10 qRT-PCR R               | TGCAGTAGTCTGTGATGATCAGGTT           |
| Actin qRT-PCR F                  | TGTATGCCAGTGGTTCGTACCA              |
| Actin qRT-PCR R                  | CCAGCAAGGTCGAGACGAA                 |
| OsRR2 cloning F                  | TCATGTCTGTCGGAGAATGAG               |
| OsRR2 cloning R                  | CGAGCAGGATGAGCTTGAA                 |
| OsRR3 cloning F                  | ACGGTGGATAGTGGCAAGAG                |
| OsRR3 cloning R                  | AAGTCTTCAGCCCCCTCCT                 |
